# Supplementary material
Source: HighWire-hosted journal article supplement (https://bmjopenquality.bmj.com/content/10/3/e001199)
Supplement: inline-supplementary-material-2 [file inline-supplementary-material-2.pdf]

## CF Rapid Lung Function Decline Checklist

To be completed every 12 months for Lung Zones C and D

| <b><u>Contributors to Rapid Decline</u></b> | <b><u>Yes</u></b>        | <b><u>Maybe</u></b>      | <b><u>No</u></b>         | <b><u>Possible Actions</u></b>                                                                        |
|---------------------------------------------|--------------------------|--------------------------|--------------------------|-------------------------------------------------------------------------------------------------------|
| <b><u>Sinopulmonary</u></b>                 |                          |                          |                          |                                                                                                       |
| Progressive pulmonary disease               | <input type="checkbox"/> | <input type="checkbox"/> | <input type="checkbox"/> | Ensure on dornase alfa, hypertonic saline, CFTR modulator; consider chest CT, Azithromycin, admission |
| New airway pathogen                         | <input type="checkbox"/> | <input type="checkbox"/> | <input type="checkbox"/> | Consider bronchoscopy                                                                                 |
| Unusual airway pathogen                     | <input type="checkbox"/> | <input type="checkbox"/> | <input type="checkbox"/> | Consider infectious disease consultation                                                              |
| Ineffective airway clearance                | <input type="checkbox"/> | <input type="checkbox"/> | <input type="checkbox"/> | Additional RT evaluation (e.g huff cough practice, different method)                                  |
| Low physical activity/exercise capacity     | <input type="checkbox"/> | <input type="checkbox"/> | <input type="checkbox"/> | Physical therapy evaluation, exercise prescription                                                    |
| Allergic bronchopulmonary aspergillosis     | <input type="checkbox"/> | <input type="checkbox"/> | <input type="checkbox"/> | Check IgE and/or ABPA panel                                                                           |
| Sinus Disease                               | <input type="checkbox"/> | <input type="checkbox"/> | <input type="checkbox"/> | Sinus CT and/or ENT, allergy evaluation                                                               |
| Asthma                                      | <input type="checkbox"/> | <input type="checkbox"/> | <input type="checkbox"/> | Pre-post bronchodilator spirometry                                                                    |
| <b><u>GI/Endocrine</u></b>                  |                          |                          |                          |                                                                                                       |
| Aspiration/GERD/Delayed gastric emptying    | <input type="checkbox"/> | <input type="checkbox"/> | <input type="checkbox"/> | GI consultation, pH/impedance probe                                                                   |
| Nutritional compromise                      | <input type="checkbox"/> | <input type="checkbox"/> | <input type="checkbox"/> | Additional dietitian evaluation, appetite stimulant                                                   |
| CFRD/Impaired glucose tolerance             | <input type="checkbox"/> | <input type="checkbox"/> | <input type="checkbox"/> | HbA1C, OGTT, endocrine consultation, CGM                                                              |
| <b><u>Psychosocial</u></b>                  |                          |                          |                          |                                                                                                       |
| Mental health (Depression, Anxiety, ADHD)   | <input type="checkbox"/> | <input type="checkbox"/> | <input type="checkbox"/> | Additional SW/mental health coordinator evaluation and referrals                                      |
| Substance use/abuse                         | <input type="checkbox"/> | <input type="checkbox"/> | <input type="checkbox"/> | Additional SW/mental health coordinator evaluation                                                    |
| Smoke/irritant exposure                     | <input type="checkbox"/> | <input type="checkbox"/> | <input type="checkbox"/> | Additional occupational history, SW evaluation                                                        |
| Non-adherence                               | <input type="checkbox"/> | <input type="checkbox"/> | <input type="checkbox"/> | Additional SW/mental health evaluation, use adherence/MI tool                                         |
| Missed appointments                         | <input type="checkbox"/> | <input type="checkbox"/> | <input type="checkbox"/> | Additional SW evaluation                                                                              |
| Financial barriers                          | <input type="checkbox"/> | <input type="checkbox"/> | <input type="checkbox"/> | Additional SW evaluation                                                                              |
| Lack of disease understanding               | <input type="checkbox"/> | <input type="checkbox"/> | <input type="checkbox"/> | Education activity/Transition program, pharmacist education                                           |
